over, these antibodies recognized  $\beta 2$ -glycoprotein I or  $\beta 2$ -glycoprotein I-cardiolipin complex (8). Patients with antiphospholipid antibodies related to autoimmune diseases show reactivity against this protein, whereas patients with transient antiphospholipid antibodies do not (1).

In conclusion, we have described the association of type I diabetes and APS in a patient who presented a retinal artery occlusion. We consider that APS should be taken into account in type I diabetic patients with thrombotic events because preventive therapy is readily available.

JOSE M. MANZANARES, MD

IGNACIO CONGET, MD, PHD

CAMINO RODRÍGUEZ-VILLAR, MD

DOLORS TASSIES, MD, PHD

FRANCISCA FERNÁNDEZ-FERNÁNDEZ, MD

RICARD CERVERA, MD, PHD

ISAAC LEVY, MD, PHD

RAMON GOMIS, MD, PHD

From the Endocrinology and Diabetes Unit (J.M.M., I.C., C.R.-V., F.F.-F., I.L., R.G.), the Haemotherapy and Haemostasis Unit (D.T.), and the Systemic Autoimmune Diseases Unit (R.C.), Hospital Clínic, Universitat de Barcelona, Barcelona, Spain.

Address correspondence to Ignacio Conget, MD, PhD, Servei d'Endocrinologia, Hospital Clínic, Vil·larroel, 170, 08036 Barcelona, Spain.

## References

- Asherson RA, Cervera R: Anticardiolipin antibodies, chronic biologic false positive tests for syphilis and other antiphospholipid antibodies. In *Dubois' Lupus Erythematosus*. Wallace DJ, Hahn BH, Eds. Philadelphia, PA, Lea & Febiger, 1993, p. 233-245
- Hendra TJ, Baguley E, Harris EN, Khamashta MH, Trembath RC, Hughes GRV, Yudkin JS: Anticardiolipin antibody levels in diabetic subjects with and without coronary artery disease. *Post Med J* 65:140-143, 1989
- Lorini R, D'Annunzio G, Montecucco C, Caporali R, Vitali L, Pessino P, Severi F: Anticardiolipin antibodies in children and adolescents with insulin-dependent diabetes mellitus. *Eur J Pediatr* 154:105-108, 1995
- Labutta RJ: Ophthalmic manifestations in the antiphospholipid syndrome. In *The Antiphospholipid Syndrome*. Asherson RA, Cervera R, Piette JC, Shoenfeld Y, Eds. Boca Raton, FL, CRC. In press
- Irvine WJ, McCallum CJ, Gray RS, Campbell CJ, Duncan LJP, Farquhar JW, Vaughan H, Morris PJ: Pancreatic islet-cell antibodies in diabetes mellitus correlated with the duration and type of diabetes, coexistent autoimmune disease, and HLA type. *Diabetes* 26:138-147, 1977
- Nakanishi K, Kobayashi T, Miyashita H, Okubo M, Sugimoto T, Murase T, Kosaka K, Hara M: Relationships among residual  $\beta$  cells, exocrine pancreas, and islet cell antibodies in insulin-dependent diabetes mellitus. *Metabolism* 42:196-203, 1993
- Anzai K, Nakamura M, Nagafuchi S, Iwakiri R, Ichinose I, Mitsugi K, Kuroki M, Nakano S, Niho Y: Production of anti-cardiolipin antibody in AKR/J mice with streptozotocin-induced insulinitis and diabetes. *Diabetes Res Clin Prac* 20:29-37, 1993
- Anzai K, Nagafuchi S, Okubo K, Ono J: Appearance of autoantibodies to the complex of  $\beta 2$ -glycoprotein I and cardiolipin in NOD mice (Abstract). *Diabetologia* 37(Suppl. 1):A94, 1994

## Acarbose: In Search for its Real Indications in Current Medical Practice

Controversy exists regarding what drug to use as the next therapeutic step for patients with NIDDM when diet alone does not achieve adequate glycemic control or what drug to add for patients not controlled by a single drug or insulin treatment. When two drugs are similarly effective, the choice between them is determined by adverse effects and costs.

Recently, several articles have appeared regarding the benefits of acarbose in clinical practice. Chiasson et al. (1) compared acarbose against placebo in a large group of patients with well-controlled diabetes (mean glycosylated HbA<sub>1c</sub> <8%) by diet alone, oral hypoglycemic agents, or insulin. The addition of acarbose only modestly improved the blood glucose control during 1 year of therapy. This was associated with gastrointestinal side effects in a large number of patients. The authors conclude that acarbose improved glycemic control in patients with NIDDM regardless of concurrent hypoglycemic medications. Coniff et al. (2) studied the safety and efficacy of three doses of acarbose compared with placebo in NIDDM patients on dietary therapy alone. Acarbose significantly reduced HbA<sub>1c</sub> levels and postprandial hyperglycemia. However, patients had an average HbA<sub>1c</sub> <9%, and after 16 weeks

of treatment, HbA<sub>1c</sub> levels were similar in both groups. In the July issue of *Diabetes Care*, Coniff et al. (3) presented the results of using acarbose in conjunction with diet and insulin therapy in insulin-requiring type II diabetic patients. Treatment with acarbose was associated with significant reductions in HbA<sub>1c</sub> and in total daily insulin dose. It must be considered that the main HbA<sub>1c</sub> at entry to the study was <7%. Gomez Pérez et al. (4) reported in 1992 significant reductions in fasting and postprandial glycemia but not significant differences in HbA<sub>1c</sub> in poorly controlled NIDDM patients who had acarbose added to sulfonylureas compared with placebo.

From these studies, we may conclude that treatment with acarbose is a safe and effective adjunct to dietary therapy for the treatment of NIDDM and has a low risk of serious side effects (particularly hypoglycemia, weight gain, and/or hyperinsulinism) when compared with insulin or sulfonylureas. Novel therapeutic approaches that may improve metabolic control and prognosis in diabetic patients are always welcome. Acarbose, an inhibitor of intestinal  $\alpha$ -glucosidase, impairs carbohydrate digestion and delays and partially prevents absorption of carbohydrates. The main advantages of acarbose are related to a diminished postprandial increment in blood glycemia with diminished insulin requirements and overall better glycemic control.

Many questions remain regarding the clinical use of acarbose. Can it help obese NIDDM patients in poor metabolic control as a first-line drug? Is it worthwhile to add another drug to reduce postprandial glycemia and hyperinsulinism when patients are in good metabolic control? Are the gastrointestinal effects severe enough to produce low adherences during long-term therapy? Can adding acarbose be useful in patients with secondary failure to oral agents before starting them on insulin? Hopefully, this last question will be answered with a study that is currently being carried out in our department.

ISRAEL LERMAN, MD

FRANCISCO JAVIER GOMEZ PEREZ, MD

CARLOS A. AGUILAR-SALINAS, MD

JUAN ANTONIO RULL RODRIGO, MD

From the Department of Diabetes and Lipid Metabolism, Instituto Nacional de la Nutrición Salvador Zubirán, Mexico City, Mexico.

Address correspondence to Israel Lerman, MD,

Departamento de Diabetes y Metabolismo de Lípidos, Instituto Nacional de la Nutrición Salvador Zubirán, Vasco de Quiroga 15, Tlalpan 14000, Mexico City, Mexico. E-mail: caas%nutricio@condor.dgsc.unam.mx.

## Reply to Selby et al.

In the April issue of *Diabetes Care*, the article, "Risk factors for lower extremity amputation in persons with diabetes," by Selby et al., discusses risk factors that are evaluated in the database, including smoking status, serum cholesterol and creatinine, blood pressure, height, weight, obesity, and other complications such as neuropathy, stroke, retinopathy, proteinuria, and myocardial infarction. Peripheral vascular disease and its relation to smoking is mentioned in the discussion. However, no data were presented for evidence of peripheral vascular disease. I found no reference to symptoms (claudication), signs (decreased pulses), and/or noninvasive testing (Doppler pressures and wave forms, and Tc Po<sub>2</sub> values) in this article.

Numerous articles, old and new, have discussed the importance of the assessment of the peripheral vascular status to foot salvage. The references listed below are only a small sample from a vast amount of literature on this important subject. There are diabetic patients in whom detection of surgically treatable peripheral vascular disease might lead to foot salvage or permit more distal surgical amputations.

Vascular evaluation is an essential component of assessment of diabetic lower-extremity disease. Clinicians should be aware of the relevance of peripheral vascular disease to lower-extremity amputations.

Alice N. Bessman, MD

From the Rancho Los Amigos Medical Center, Downey; and the University of Southern California, School of Medicine, Los Angeles, California.

Address correspondence to Alice N. Bessman, MD, Rancho Los Amigos Medical Center, 7601 E. Imperial Highway, Room 256 H.B., Downey, CA 90242.

## References

1. Bessman AN, Kasim S: Diabetic foot infections in the elderly. *Geriatrics* 40:54-63, 1985
2. Levin ME, Sicard GA: Evaluating and treating diabetic peripheral vascular disease, part I. *Clin Diabetes* 5:62-70, 1987
3. Rosenblum BI, Pomposelli FB, Giurini JM, Gibbons GW, Freeman DV, Chirzan JS, Campbell DR, Habershaw GM, Logerfo FW: Maximizing foot salvage by a combined approach to foot ischemia and neuropathic ulceration in patients with diabetes. *Diabetes Care* 17:983-987, 1994

## References

1. Chiasson JL, Josse RG, Hunt JA, Palmason C, Rodger NW, Ross SA, Ryan EA, Tan MH, Wolever TMS: The efficacy of acarbose in the treatment of patients with non-insulin dependent diabetes mellitus: a multicenter controlled clinical trial. *Ann Intern Med* 121:928-935, 1994
2. Coniff RF, Shapiro JA, Robbins D, Kleinfield R, Seaton TB, Beisswenger P, Mc Gill JB: Reduction of glycosylated hemoglobin and postprandial hyperglycemia by acarbose in patients with NIDDM: a placebo controlled dose-comparison study. *Diabetes Care* 18:817-824, 1995
3. Coniff RF, Shapiro JA, Seaton TB, Hoogwerf BJ, Hunt JA: A double-blind placebo-controlled trial evaluating the safety and efficacy of acarbose for the treatment of patients with insulin-requiring type II diabetes. *Diabetes Care* 18:928-932, 1995
4. Gomez Pérez FJ, Violante R, Sanchez Arriaga LF, Wong B, Rull JA: Eficacia y tolerancia de acarbose en pacientes diabéticos no dependientes de insulina. *Rev Invest Clin* 44:77-84, 1992
